# THE AMERICAN JOURNAL OF PSYCHIATRY

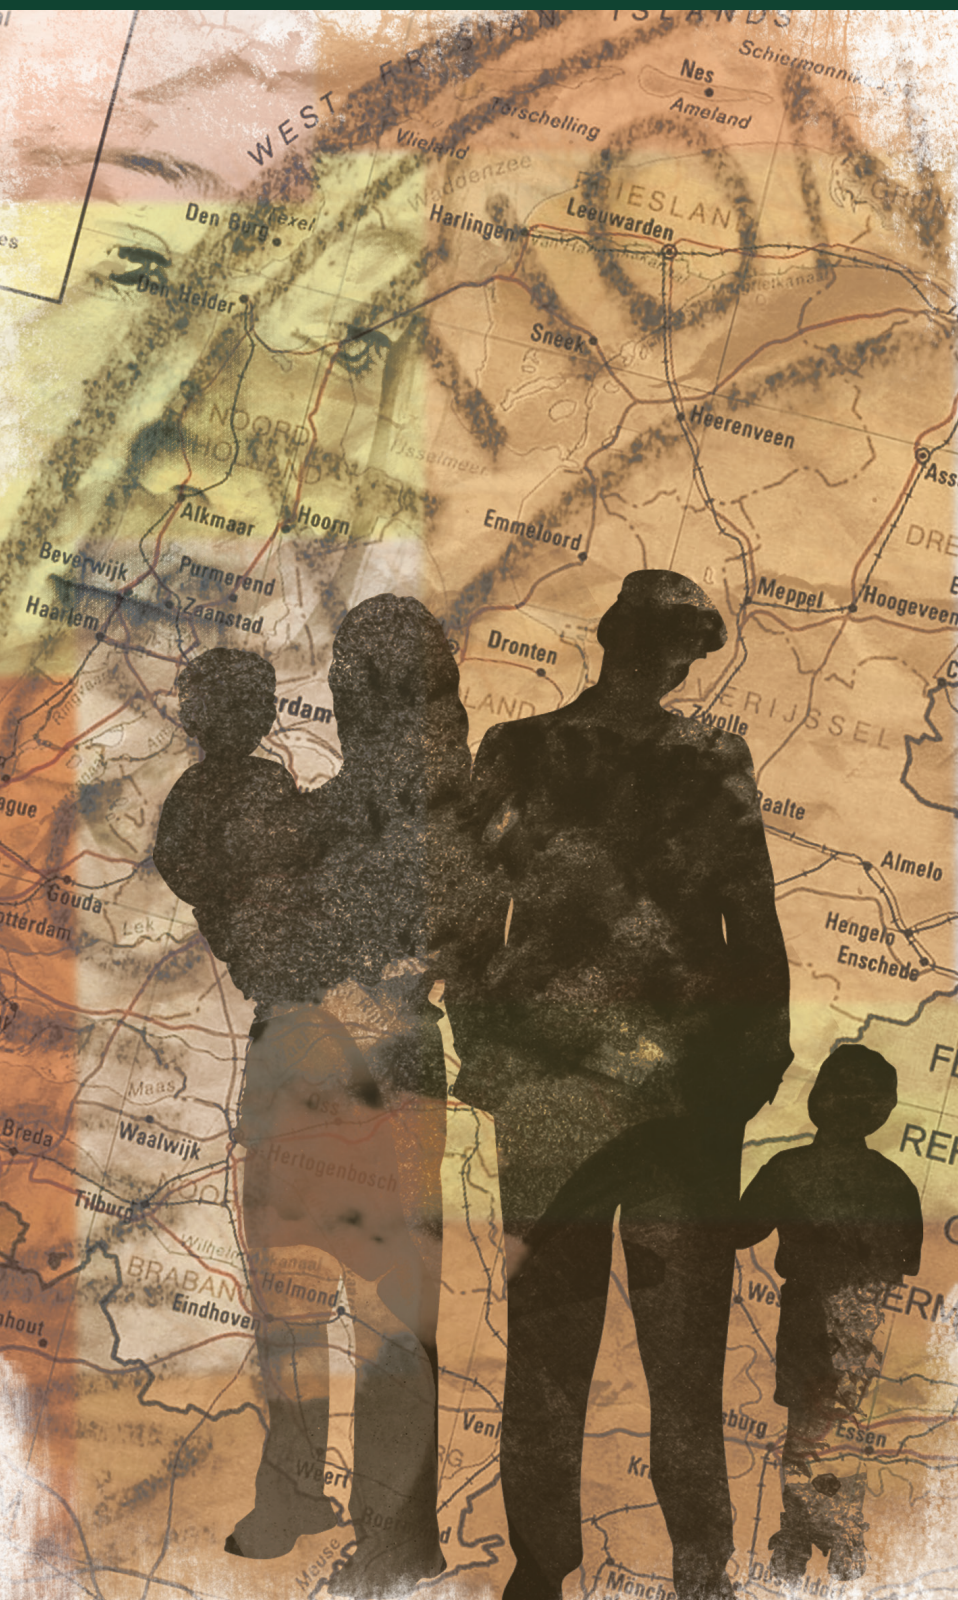

**The Study of Fear Extinction:  
Implications for Anxiety Disorders**  
Bronwyn M. Graham, Ph.D., M.Psychol.,  
and Mohammed R. Milad, Ph.D. 1255

**The Columbia–Suicide Severity  
Rating Scale: Initial Validity and  
Internal Consistency Findings  
From Three Multisite Studies With  
Adolescents and Adults**  
Kelly Posner, Ph.D., et al. 1266

◀ **Age at Migration and Future Risk  
of Psychotic Disorders Among  
Immigrants in the Netherlands:  
A 7-Year Incidence Study**  
Wim Veling, M.D., Ph.D., et al. 1278

**Dopamine Synthesis Capacity  
Before Onset of Psychosis:  
A Prospective [<sup>18</sup>F]-DOPA PET  
Imaging Study**  
Oliver D. Howes, M.R.C.Psych.,  
Ph.D., et al. 1311

**Continuing Medical Education 1363**

**December 2011**  
**Volume 168 • Number 12**

Official Journal of the  
AMERICAN PSYCHIATRIC ASSOCIATION

[ajp.psychiatryonline.org](http://ajp.psychiatryonline.org)
