# The Residents' JOURNAL

*The Residents' JOURNAL*  
a publication of  
The American Journal of Psychiatry

October 2011      Volume 6      Issue 10

**Inside**

- In This Issue**
- Recent and Possible New Changes in Graduate Medical Education**  
Sarah M. Fayad, M.D.
- Interventional Psychiatry**  
Adam Philip Stern, M.D.
- Deep Brain Stimulation for Treatment-Resistant Depression**  
Jaya Padmanabhan, M.D.;  
Anthony Marfoe, M.D.
- Anesthetic Management During Electroconvulsive Therapy**  
John McNeil, M.D.
- What is Interventional Psychiatry?**  
Anshya Vahabzadeh, M.D.
- Night Terrors Secondary to Medication in an Active Duty Air Force Paramedic**  
Jeffrey J. Hollingsworth, D.O.; Jessica G. Hollingsworth, B.S.N.
- A Residents' Guide to Telepsychiatry**  
Joel Strouch, M.D.
- Test Your Knowledge**
- Residents' Journal Info**

**In This Issue**



This issue of *The Residents' Journal* features articles in the area of interventional psychiatry. The section begins with a commentary by Adam Philip Stern, M.D., who provides background information pertaining to the definition and use of interventional psychiatry as well as mechanisms and procedures. Jaya Padmanabhan, M.D., and Anthony Marfoe, M.D., discuss the use of deep brain stimulation for treatment-resistant depression. John McNeil, M.D., outlines important issues surrounding anesthetic management during ECT. The section concludes with an article by Anshya Vahabzadeh, M.D., who offers valuable information regarding the term interventional psychiatry as well as its implications in the field of psychiatry.

|                                                                                                                                                     |                                                                                                                                                                    |
|-----------------------------------------------------------------------------------------------------------------------------------------------------|--------------------------------------------------------------------------------------------------------------------------------------------------------------------|
| <p>Editor-in-Chief<br/>Sarah M. Fayad, M.D.</p> <p>Section Editor<br/>Joseph M. Caronella, M.D.</p> <p>Associate Editor<br/>Martha Sewell, M.D.</p> | <p>Editor Emerit<br/>Sarah B. Johnson, M.D.<br/>Molly McVey, M.D.</p> <p>Guest Section Editor<br/>Adam Philip Stern, M.D.</p> <p>Staff Editor<br/>Angela Moore</p> |
|-----------------------------------------------------------------------------------------------------------------------------------------------------|--------------------------------------------------------------------------------------------------------------------------------------------------------------------|

The Residents' Journal accepts manuscripts authored by medical students, resident physicians, and fellows. To submit your paper, please visit the manuscript submission site at [mc.manuscriptcentral.com/appi-ajp](http://mc.manuscriptcentral.com/appi-ajp) and either create an account or use your existing account. For manuscript type, select "Residents." Then follow the instructions to upload your manuscript. Residents who are interested in participating as Guest Section Editors should e-mail the Residents' Journal Editor-in-Chief Sarah M. Fayad at [fayad@ufl.edu](mailto:fayad@ufl.edu).

See the September 2010 issue for details on the new peer review process.

The Residents' Journal is sent free-of-charge to all psychiatry residents. Anyone interested in being included on the distribution list should contact Angela Moore, the Residents' Journal staff editor at [ajp@psych.org](mailto:ajp@psych.org) with "Subscribe to Residents' Journal" in the subject line.

**Upcoming Issue Themes**  
January: PTSD and Traumatic Brain Injuries

To access the complete Residents' Journal archives, visit [ajp.psychiatryonline.org/misc/Residents\\_Journal.dtl](http://ajp.psychiatryonline.org/misc/Residents_Journal.dtl)

# The American Journal of PSYCHIATRY

Latest  
IMPACT  
FACTOR  
12.759!

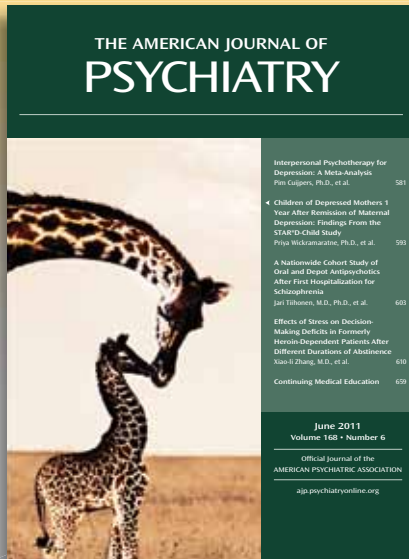

## Official Journal of the American Psychiatric Association

Edited by Robert Freedman, M.D.

- The *American Journal of Psychiatry* has an impact factor of 12.759, a rise from last year's 12.522 and 2-point rise from the previous year's 10.545, according to the recently released 2010 Journal Citation Reports® (Thomson Reuters, 2011), placing it 2nd among the 126 journals in psychiatry journals indexed, while still remaining the far-and-away leader in total citations.
- *The American Journal of Psychiatry* (AJP) is also the #2 journal in psychiatry in terms of immediacy according to Thomson Scientific's Immediacy Index. This important performance metric

is calculated by dividing the number of citations to articles published in a given year by the number of articles published in that year.

- The Immediacy Index is a good measure of how quickly a given journal's articles are cited—AJP's #2 placement is a result of publishing articles that are relevant, covering current "hot" topics and cutting-edge research, and getting these findings to the field faster with AJP in Advance, the Journal's online-ahead-of-print publication protocol.
- A recent poll conducted by the BioMedical & Life Sciences Division of The Special Libraries Association identified the 100 most influential journals in all of Biology & Medicine over the last 100 years. *The American Journal of Psychiatry* was among those honored, the only psychiatry/psychology journal represented.

No other psychiatric journal reaches more psychiatrists with greater impact or immediacy than the journal that the overwhelming majority of psychiatrists considers essential: AJP.

ISSN 0002-953X      [ajp.psychiatryonline.org](http://ajp.psychiatryonline.org)

To order a subscription, visit [www.appi.org](http://www.appi.org).

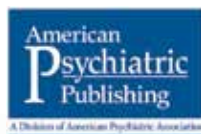

The First and Last Word in Psychiatry

[www.appi.org](http://www.appi.org) • 1-800-368-5777 • 703-907-7322

Find us on [facebook](https://www.facebook.com/ajp) and [twitter](https://twitter.com/ajp)      Priority Code AH1132

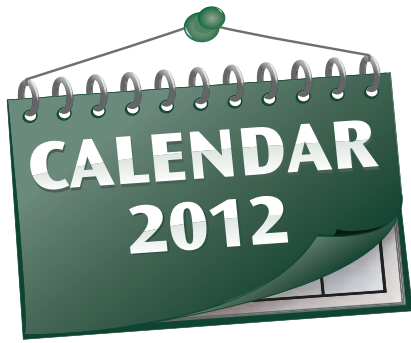

*For free listing of your organization's official annual or regional meeting, please send us the following information: sponsor, location, inclusive dates, type and number of continuing education credits (if available), and the name, address, and telephone number of the person or group to contact for more information. In order for an event to appear in our listing, all notices and changes must be received at least 6 months in advance of the meeting and should be addressed to:*

***Calendar, American Journal of Psychiatry, 1000 Wilson Boulevard, Suite 1825, Arlington, VA 22209-3901, [swstrate@psych.org](mailto:swstrate@psych.org) (e-mail).***

*Because of space limitations, only listings of meetings of the greatest interest to Journal readers may be included.*

---

## MARCH

**March 21–24**, 23rd Annual Meeting, American Neuropsychiatric Association, New Orleans, La. Contact: (614) 447-2077 or visit [www.anpaonline.org](http://www.anpaonline.org) (web site).

---

## APRIL

**April 22–25**, Annual Meeting of the North American Society for Psychosocial Obstetrics and Gynecology (NASPOG), Providence, R.I. Contact NASPOG National Office, 8213 Lakenheath Way, Potomac, MD 20854; (301) 983-6282 (tel); [info@naspog.org](mailto:info@naspog.org) (email); [www.naspog.org](http://www.naspog.org) (web site).

---

## MAY

**May 3–5**, 56th Annual Meeting, American Academy of Psychoanalysis and Dynamic Psychiatry, Philadelphia, Pa.

Contact: Executive Office, AAPDP, PO Box 30, Bloomfield, CT 06002; (888) 691-8281 (tel), (860) 286-0787 (fax), [info@aapdp.org](mailto:info@aapdp.org) (e-mail), [www.aapdp.org](http://www.aapdp.org) (web site).

**May 5–9**, 165th Annual Meeting, American Psychiatric Association, Philadelphia, Pa. Contact: APA Annual Meetings Dept., 1000 Wilson Blvd., Ste. 1825, Arlington, VA 22209; (703) 907-7815.

---

## JUNE

**June 23–27**, Joint Organizational Meeting of the Organization of Teratology Information Specialists, the Teratology Society, and the Neurobehavioral Teratology Society, Baltimore, Md. Contact Ms. Dee Quinn, University of Arizona, Drachman Hall, PO Box 210202, 1295 N. Martin, Room B308, Tucson, AZ 85721-0202; (520) 626-3547 (tel); [www.oteratology.org](http://www.oteratology.org);

[www.teratology.org](http://www.teratology.org); [www.nbts.org](http://www.nbts.org).

---

## OCTOBER

**October 3–5**, International Biennial Congress of the Marcé Society (International Society for the Understanding, Prevention and Treatment of Mental Illness Related to Childbearing), in collaboration with the Société Marcé Francophone, Paris, France (conducted in English). Contact: Ms. Nicole Greer, 5034-A Thoroughbred Lane, Brentwood, TN 37027 USA; (615) 324-2362 (tel); [info@marcesociety.com](mailto:info@marcesociety.com) (email); [www.marcesociety.com](http://www.marcesociety.com) (web site).

**October 4–7**, 64th Institute on Psychiatric Services, American Psychiatric Association, New York, NY. Contact: Jill Gruber, APA Annual Meetings Dept., 1000 Wilson Blvd., Ste. 1825, Arlington, VA 22209; (703) 907-7815.

## Contents

- A21 Editorial Board  
A23 Highlights of this issue

### Editorials

- 439 **The future of psychiatry**  
F. Oyeboode and M. Humphreys
- 441 **Physical health disparities and mental illness: the scandal of premature mortality**  
G. Thornicroft
- 442 **Woodbridge Hospital – British Psychiatry in Singapore – extra**  
Ee Heek Kua
- 443 **The population impact of improvements in mental health services: the case of Australia**  
A. F. Jorm

### Review article

- 445 **Conceptual framework for personal recovery in mental health: systematic review and narrative synthesis**  
M. Leamy, V. Bird, C. Le Bouthillier, J. Williams and M. Slade

- 452 **Street-wise – poems by doctors**  
Wendy French

### Papers

- 453 **Outcomes of Nordic mental health systems: life expectancy of patients with mental disorders**  
K. Wahlbeck, J. Westman, M. Nordentoft, M. Gissler and T. Munk Laursen
- 459 **Lay health worker led intervention for depressive and anxiety disorders in India: impact on clinical and disability outcomes over 12 months**  
V. Patel, H. A. Weiss, N. Chowdhary, S. Naik, S. Pednekar, S. Chatterjee, B. Bhat, R. Araya, M. King, G. Simon, H. Verdell, B. R. Kirkwood
- 467 **Schizophrenia medication adherence in a resource-poor setting: ransomised controlled trial of supervised treatment in out-patients for schizophrenia (STOPS)**  
S. Farooq, Z. Nazar, M. Irfan, J. Akhter, E. Gul, U. Irfan and F. Naeem
- 473 **Aggression and seclusion on acute psychiatric wards: effect of short-term risk assessment**  
R. van de Sande, H. L. I. Nijman, E. O. Noorthoorn, A. I. Wierdsma, E. Helliendoorn, C. van der Staak and C. L. Mulder
- 478 **Is nowhere safe? Homicide in hospital – in 100 words**  
Robin Ferner
- 479 **Changes in met perceived need for mental healthcare in Australia from 1997 to 2007**  
G. N. Meadows and I. Bobevski

- 485 **Prevalence of anxiety and its correlates among older adults in Latin America, India and China: cross-cultural study**  
A. M. Prina, C. P. Ferri, M. Guerra, C. Brayne and M. Prince
- 492 **Visual hallucinations in dementia with Lewy bodies: transcranial magnetic stimulation study**  
J.-P. Taylor, M. Firbank, N. Barnett, S. Pearce, A. Livingstone, U. Mosimann, J. Eyre, I. G. McKeith and J. T. O'Brien
- 501 **Assessing the 'true' effect of active antidepressant therapy v. placebo in major depressive disorder: use of a mixture model**  
M. E. Thase, K. G. Larsen and S. H. Kennedy

### Short reports

- 508 **Anti-NDMA receptor encephalitis: an important differential diagnosis in psychosis**  
H. Barry, O. Hardiman, D. G. Healy, M. Keogan, J. Moroney, P. P. Molnar, D. R. Cotter and K. C. Murphy
- 510 **Cost utility of behavioural activation delivered by the non-specialist**  
D. Ekers, C. Godfrey, S. Gilbody, S. Parrott, D. A. Richards, D. Hammond and A. Hayes

### Columns

- 512 Correspondence  
520 Book reviews  
523 Contents of *Advances in Psychiatric Treatment*  
524 Books received  
525 Contents of the *American Journal of Psychiatry*  
526 From the Editor's desk

### Cover picture

*Metaphors of the Mind* (2007). Rhys Bevan Jones (b. 1976)

Rhys Bevan Jones is a higher trainee in psychiatry and clinical lecturer in Cardiff. He has a special interest in the relationship between psychiatry and the visual world, and in particular how themes such as the mind, mental states and identity can be explored through still and moving images. He has studied at art colleges such as Central St Martins and Kingston University, London. He has exhibited his work in London and Wales and has illustrated a number of publications.

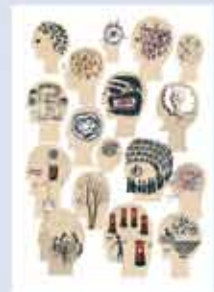

This work is based on the responses of colleagues, students, friends and family to the question 'How do you "see" the mind?'. The media used include printmaking, pen and ink and digital imaging (see [www.rhysbevanjones.com](http://www.rhysbevanjones.com) for more examples). Rhys is currently investigating the use of illustration, film and multimedia in medical education, psychoeducation research and public engagement work.

We are always looking for interesting and visually appealing images for the cover of the *Journal* and would welcome suggestions or pictures, which should be sent to Dr Allan Beveridge, British Journal of Psychiatry, 17 Belgrave Square, London SW1X 8PG, UK or [bjp@rcpsych.ac.uk](mailto:bjp@rcpsych.ac.uk).

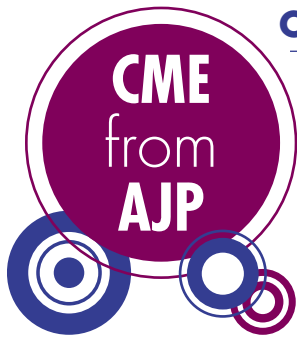

## Continuing Medical Education

Three articles in this issue form the basis of a short course with questions that can be answered for up to 1 *AMA PRA Category 1 Credit™* each by visiting <http://cme.psychiatryonline.org/> and clicking on “American Journal of Psychiatry CME.”

CME credit is issued only online, and a paid subscription to the AJP CME course program is required.

This month's courses appear on pages 1363–1366.

FREE AUDIO!

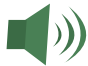

## Have You Heard?

You can listen to highlights of *The American Journal of Psychiatry* by downloading a monthly free .mp3 audio file from our web site (<http://ajp.psychiatryonline.org/audio.aspx#>) or by subscribing to the AJP Audio podcast at iTunes or other feed reader. Presented by Deputy Editor Dr. Susan Schultz or by Executive Editor Michael Roy, each month's audio lasts approximately 30 minutes and covers several research articles, the Treatment in Psychiatry feature, and one or two editorials.

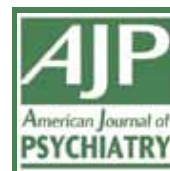

Coming in the January 2012 issue\*

## THE AMERICAN JOURNAL OF PSYCHIATRY

### Behavioral Health Insurance Parity: Does Oregon's Experience Presage the National Experience With the Mental Health Parity and Addiction Equity Act?

K. J. McConnell, S.H.N. Gast, M.S. Ridgely, N. Wallace, N. Jacuzzi, T. Rieckmann, B.H. McFarland, and D. McCarty

### Risk Taking and the Adolescent Reward System: A Potential Common Link to Substance Abuse

S. Schneider, J. Peters, U. Bromberg, S. Brassen, S.F. Miedl, T. Banaschewski, G.J. Barker, P. Conrod, H. Flor, H. Garavan, A. Heinz, B. Ittermann, M. Lathrop, E. Loth, K. Mann, J.-L. Martinot, F. Nees, T. Paus, M. Rietschel, T.W. Robbins, M.N. Smolka, R. Spanagel, A. Ströhle, M. Struve, G. Schumann, C. Büchel, and The IMAGEN Consortium

### Risk of Death From Accidental Overdose Associated With Psychiatric and Substance Use Disorders

A.S.B. Bohnert, M.A. Ilgen, R.V. Ignacio, J.F. McCarthy, M. Valenstein, and F.C. Blow

### Risk of Mortality Among Individual Antipsychotics in Patients With Dementia

H.C. Kales, H.M. Kim, K. Zivin, M. Valenstein, L.S. Seyfried, C. Chiang, F. Cunningham, L.S. Schneider, and Frederic C. Blow

\*Can't wait? Visit [ajp.psychiatryonline.org](http://ajp.psychiatryonline.org) and click the “AJP in Advance” logo to see all articles uploaded in advance of print!
